# Supplementary material
Source: PubMed Central journal article supplement (PMC7833801)
Supplement: mmc1.pdf [file mmc1.pdf]

**Supplementary Table 1:** Numbers of patients with glomerular diseases followed at each center\*.

| <b>Centers</b>               | <b>Number of followed-up GN Patients (n)</b> | <b>COVID-19 Cases (n)</b> |
|------------------------------|----------------------------------------------|---------------------------|
| Vall d'Hebron, Barcelona, SP | 1,000-1,500                                  | 16                        |
| London, UK                   | 2,040                                        | 5                         |
| Bellvitge, Barcelona, SP     | 679                                          | 4                         |
| Glasgow, UK                  | 600                                          | 4                         |
| Reading, UK                  | 290                                          | 3                         |
| Mexico City, MX              | 300                                          | 2                         |
| New York, US                 | 300                                          | 2                         |
| Parma, IT                    | 200                                          | 2                         |
| Madrid, SP                   | 370                                          | 1                         |
| Bologna, IT                  | 300                                          | 1                         |

\*The number is an approximate provided by each center.

**Supplementary Table 2:** Density of immunosuppression based on glomerular disease diagnosis and duration of disease.

| Glomerular disease                 | Duration of disease                                                                                          |                                                                         |                                                                                                               |                                                                 |                                                                                                                            |
|------------------------------------|--------------------------------------------------------------------------------------------------------------|-------------------------------------------------------------------------|---------------------------------------------------------------------------------------------------------------|-----------------------------------------------------------------|----------------------------------------------------------------------------------------------------------------------------|
|                                    | < 6 months                                                                                                   | 6-12 months                                                             | 12-24 months                                                                                                  | 2-5 years                                                       | >5years                                                                                                                    |
| Lupus nephritis                    | <ul style="list-style-type: none"> <li>• RTX, (5 mos)</li> <li>• MP: 250 mg (41 d); Pred: 16 mg/d</li> </ul> | <ul style="list-style-type: none"> <li>• MMF + Pred 10 mg/d</li> </ul>  | <ul style="list-style-type: none"> <li>•MMF + Pred 5 mg/d</li> <li>•Methotrexate</li> </ul>                   | <ul style="list-style-type: none"> <li>• Tacrolimus</li> </ul>  | <ul style="list-style-type: none"> <li>•Pred: 5 mg/d</li> <li>•MMF + Pred: 10 mg/d</li> <li>•MMF + Pred: 5 mg/d</li> </ul> |
| Vasculitis                         | <ul style="list-style-type: none"> <li>• RTX (1 mos) + Pred: 5 mg /d</li> </ul>                              |                                                                         | <ul style="list-style-type: none"> <li>•Azathioprine + Pred: 7.5 mg/d</li> <li>• MMF + Pred: 5mg/d</li> </ul> |                                                                 | <ul style="list-style-type: none"> <li>• RTX (1 mos) + MMF + Pred: 5 mg/d</li> </ul>                                       |
| Minimal Change disease             |                                                                                                              |                                                                         |                                                                                                               | <ul style="list-style-type: none"> <li>•Cyclosporine</li> </ul> |                                                                                                                            |
| Focal Segmental glomerulosclerosis |                                                                                                              | <ul style="list-style-type: none"> <li>• MMF + Pred: 10 mg/d</li> </ul> |                                                                                                               |                                                                 |                                                                                                                            |
| Membranous nephropathy             |                                                                                                              |                                                                         | <ul style="list-style-type: none"> <li>RTX (1 mos)</li> </ul>                                                 |                                                                 |                                                                                                                            |
| IgA Nephropathy                    |                                                                                                              |                                                                         |                                                                                                               |                                                                 | <ul style="list-style-type: none"> <li>Pred: 25 mg/d</li> </ul>                                                            |
| Post infectious GN                 | <ul style="list-style-type: none"> <li>• Pred: 7.5 mg/d</li> </ul>                                           |                                                                         |                                                                                                               |                                                                 |                                                                                                                            |
| AA amyloid                         |                                                                                                              |                                                                         | <ul style="list-style-type: none"> <li>Azathioprine</li> </ul>                                                |                                                                 |                                                                                                                            |
| Membranoproliferative GN           |                                                                                                              |                                                                         |                                                                                                               |                                                                 | <ul style="list-style-type: none"> <li>•Sulfasalazine, Methotrexate</li> </ul>                                             |

In parenthesis are days or months administered prior to COVID-19. Each dot represents a different patient. RTX: rituximab; Pred: prednisone; MP: methylprednisolone; MMF: mycophenolate mofetil.

**Supplementary Table 3:** Complications in “kidney limited” (local) versus systemic GN patients with COVID-19.

| <b>Complication</b>                    | <b>GN total<br/>(n=40)</b>   | <b>Local GN<br/>(n=24)</b>   | <b>Systemic GN<br/>(n=16)</b> | <b>P Value</b> |
|----------------------------------------|------------------------------|------------------------------|-------------------------------|----------------|
| <b>Hospitalized</b>                    | 28 (70.0)                    | 15 (62.5)                    | 13 (81.3)                     | 0.30           |
| <b>Mechanical ventilation</b>          | 3 (11.1)<br>(n=27)           | 0<br>(n=14)                  | 3 (23.1)<br>(n=13)            | 0.10           |
| <b>Inotropes or other vasopressors</b> | 2 (7.4)<br>(n=28)            | 0<br>(n=15)                  | 2 (15.4)<br>(n=13)            | 0.21           |
| <b>Description of illness</b>          |                              |                              |                               |                |
| Pneumonia                              | 21 (52.5)                    | 12 (50)                      | 9 (56.3)                      | 0.30           |
| ARDS, non-invasive ventilation         | 3 (7.5)                      | 1 (4.2)                      | 2 (12.5)                      | 0.55           |
| ARDS, intubated                        | 3 (7.5)                      | 0                            | 3 (18.8)                      | 0.057          |
| Septic shock                           | 2 (5.0)                      | 0                            | 2 (12.5)                      | 0.15           |
| Developed AKI                          | 15 (38.5)<br>(n=39)          | 9 (37.5)                     | 6 (40.0)<br>(n=15)            | 1.0            |
| Stage 1                                | 3 (25.0)                     | 2 (25.0)                     | 1 (25.0)                      | 0.72           |
| Stage 2                                | 3 (25.0)                     | 3 (37.5)                     | 0                             |                |
| Stage 3                                | 6 (50.0)<br>(n=12)           | 3 (37.5)<br>(n=8)            | 3 (75.0)<br>(n=4)             |                |
| <b>RRT new onset</b>                   | 7 (17.5)                     | 3 (12.5)                     | 4 (25.0)                      | 0.41           |
| <b>Days of RRT</b>                     | 23.3 ±11.6<br>(n=6)          | 25.0 ±15.6<br>(n=3)          | 21.7 ±9.1<br>(n=3)            | 0.77           |
| <b>Need for RRT at discharge</b>       | 4 (80.0)<br>(n=5)            | 2 (66.7)<br>(n=3)            | 2 (100.0)<br>(n=2)            | 1.0            |
| <b>Other non-renal complications</b>   |                              |                              |                               |                |
| <b>Cardiac</b>                         |                              |                              |                               |                |
| MI                                     | 2 (5.6) (n=36)               | 1 (4.8) (n=21)               | 1 (6.7) (n=15)                | 1.0            |
| Arrhythmia                             | 1 (2.8) (n=36)               | 1 (4.8) (n=21)               | 0 (n=15)                      | 1.0            |
| GI                                     | 3 (8.1) (n=37)               | 2 (9.1) (n=22)               | 1 (6.7) (n=15)                | 1.0            |
| CNS                                    | 1 (2.7) (n=37)               | 1 (4.6) (n=22)               | 0 (n=15)                      | 1.0            |
| <b>Hematologic</b>                     |                              |                              |                               |                |
| PE                                     | 2 (5.0)                      | 1 (4.2)                      | 1 (6.3)                       | 1.0            |
| DVT                                    | 2 (5.0)                      | 0                            | 2 (12.5)                      | 0.16           |
| Superimposed bacterial infection       | 6 (15.8) (n=38)              | 3 (13.6)<br>(n=22)           | 3 (18.8)                      | 0.68           |
| <b>Length of hospital stay days</b>    | 15.0<br>(8.0-21.0)<br>(n=27) | 14.0<br>(9.0-17.0)<br>(n=15) | 16.5<br>(7.0-21.0)<br>(n=12)  | 0.87           |
| <b>Death</b>                           | 6 (15.0)                     | 2 (8.3)                      | 4 (25.0)                      | 0.20           |

Data are n (%), or mean ± SD or median (IQR). Sample sizes are listed if they are fewer than the respective denominators shown in the header row. Percentages may not add to 100 due to rounding or missing/N/A responses. AKI: Acute kidney injury; ARDS: Acute respiratory distress syndrome; CNS: Central nervous system; DVT: Deep vein thrombosis; GI: Gastrointestinal; MI: Myocardial infarction; PE: Pulmonary embolism; RRT: Renal replacement therapy.

**Supplementary Table 4:** Changes in kidney parameters in GN patients and controls stratified according to main outcomes.

|                                 | GN Patients                   |                              |                               |            |                               |                               | Controls   |                               |                              |                               |            |                               |                               |            |
|---------------------------------|-------------------------------|------------------------------|-------------------------------|------------|-------------------------------|-------------------------------|------------|-------------------------------|------------------------------|-------------------------------|------------|-------------------------------|-------------------------------|------------|
|                                 | Total<br>(n=40)               | Died<br>yes<br>(n=6)         | Died<br>No<br>(n=34)          | P<br>Value | AKI<br>(n=15)                 | AKI<br>No<br>(n=24)           | P<br>Value | Total<br>(n=80)               | Died<br>yes<br>(n=4)         | Died<br>no<br>(n=76)          | P<br>Value | AKI<br>yes<br>(n=11)          | AKI<br>No<br>(n=68)           | P<br>Value |
| <b>Serum creatinine (mg/dl)</b> |                               |                              |                               |            |                               |                               |            |                               |                              |                               |            |                               |                               |            |
| Pre COVID                       | 1.41<br>(0.89-1.91)           | 1.72<br>(1.40-1.87)          | 1.29<br>(0.87-1.93)           | 0.37       | 1.80<br>(1.13-2.12)           | 1.15<br>(0.85-1.75)           | 0.09       | 0.90<br>(0.79-1.01)<br>(n=70) | 0.90<br>(0.76-1.14)          | 0.90<br>(0.79-1.01)<br>(n=66) | 0.96       | 1.20<br>(0.80-1.30)<br>(n=10) | 0.89<br>(0.79-1.00)<br>(n=60) | 0.024      |
| At presentation                 | 1.93<br>(1.09-4.36)<br>(n=27) | 3.67<br>(2.30-5.04)<br>(n=2) | 1.93<br>(1.09-3.81)<br>(n=25) | 0.33       | 2.57<br>(1.93-5.04)<br>(n=14) | 1.23<br>(0.76-1.81)<br>(n=12) | 0.003      | 0.83<br>(0.75-1.06)<br>(n=77) | 1.03<br>(0.89-1.73)          | 0.83<br>(0.75-1.05)<br>(n=73) | 0.19       | 2.00<br>(0.94-6.20)           | 0.83<br>(0.74-0.98)<br>(n=66) | <0.001     |
| At peak                         | 2.58<br>(1.23-7.03)<br>(n=24) | 5.19<br>(2.79-7.59)<br>(n=2) | 2.20<br>(1.09-6.48)<br>(n=22) | 0.43       | 4.89<br>(2.79-7.59)<br>(n=14) | 1.09<br>(0.77-1.47)<br>(n=9)  | <0.001     | 1.02<br>(0.77-3.00)<br>(n=39) | 3.71<br>(2.39-5.02)<br>(n=2) | 0.96<br>(0.77-2.21)<br>(n=37) | 0.15       | 5.02<br>(3.00-7.00)           | 0.84<br>(0.72-1.26)<br>(n=28) | <0.001     |
| Post COVID                      | 1.50<br>(0.94-3.51)<br>(n=20) | N/A                          | 1.50<br>(0.94-3.51)<br>(n=20) | N/A        | 2.85<br>(1.36-4.51)<br>(n=11) | 0.89<br>(0.72-1.19)<br>(n=9)  | 0.015      | 0.81<br>(0.71-0.96)<br>(n=72) | 5.02<br>(n=1)                | 0.80<br>(0.71-0.94)<br>(n=71) | 0.11       | 2.01<br>(1.70-5.02)<br>(n=10) | 0.78<br>(0.69-0.86)<br>(n=62) | <0.001     |
| <b>Serum albumin (g/dl)</b>     |                               |                              |                               |            |                               |                               |            |                               |                              |                               |            |                               |                               |            |
| Pre-COVID                       | 3.54<br>±0.62<br>(n=38)       | 3.47<br>±0.43                | 3.56<br>±0.66<br>(n=32)       | 0.75       | 3.39<br>±0.69<br>(n=13)       | 3.67<br>±0.55                 | 0.32       | 3.92<br>±0.55<br>(n=35)       | 3.23<br>(n=1)                | 3.94<br>±0.54<br>(n=34)       | 0.21       | 3.83<br>±0.30<br>(n=7)        | 3.94<br>±0.60<br>(n=28)       | 0.65       |
| At presentation                 | 2.83<br>±0.88<br>(n=22)       | 2.75<br>±0.78<br>(n=2)       | 2.83<br>±0.90<br>(n=20)       | 0.90       | 2.29<br>±0.86<br>(n=11)       | 3.44<br>±0.44<br>(n=10)       | 0.001      | 3.60<br>±0.86<br>(n=62)       | 2.67<br>(n=1)                | 3.61<br>±0.86<br>(n=61)       | 0.28       | 2.95<br>±1.27<br>(n=9)        | 3.71<br>±0.73<br>(n=53)       | 0.12       |
| Post-COVID                      | 2.51<br>±0.86<br>(n=15)       | N/A                          | 2.51<br>±0.86<br>(n=15)       | N/A        | 1.96<br>±0.40<br>(n=8)        | 3.37<br>±0.57<br>(n=6)        | <0.001     | 3.61<br>±0.51<br>(n=61)       | 2.48<br>(n=1)                | 3.63<br>±0.50<br>(n=60)       | 0.026      | 3.23<br>±0.76<br>(n=9)        | 3.68<br>±0.44<br>(n=52)       | 0.12       |
| <b>Proteinuria (g/day)</b>      |                               |                              |                               |            |                               |                               |            |                               |                              |                               |            |                               |                               |            |
| Pre- COVID                      | 1.00<br>(0.33-3.20)<br>(n=35) | 0.87<br>(0.70-3.24)<br>(n=5) | 1.10<br>(0.25-2.69)<br>(n=30) | 0.65       | 2.96<br>(0.44-4.06)<br>(n=12) | 0.84<br>(0.33-1.83)<br>(n=22) | 0.17       | N/A                           | N/A                          | N/A                           | N/A        | N/A                           | N/A                           |            |
| Post-COVID                      | 3.82<br>(1.48-9.91)<br>(n=6)  | 3.65<br>(n=1)                | 3.98<br>(1.48-9.91)<br>(n=5)  | 0.86       | 3.98<br>(3.65-9.91)<br>(n=5)  | 0.30<br>(n=1)                 | 0.29       | N/A                           |                              |                               |            |                               |                               |            |

Data are mean ± SD or median (IQR). Sample sizes are listed if they are fewer than the respective denominators shown in the header row. "Post-COVID" is defined by absence of, or marked improvement in original COVID-19-related symptoms or signs. N/A not available.
